# Supplementary material
Source: Research Square preprint supplement (doi:10.21203/rs.3.rs-9683640/v1)
Supplement: Supplementary file 1 [file 14be3aaf0ef8be42a9a9cd07.docx]

**Comparative effects of protein glutaminase and transglutaminase on fermentation-induced gelation of pea, faba bean, and soy protein isolates**

Ashwitha Poojarya*, Ourania Gousetia, Poul Erik Jensena

a Department of Food Science, University of Copenhagen, Rolighedsvej 26, 1958 Frederiksberg, Denmark.

*Corresponding author (Email: ashwitha@food.ku.dk; Tel: +4535333222)

**Table of contents**

| Figure S1. Appearance of gels prepared from protein concentrates and isolates | 2 |
| --- | --- |
| Figure S2. Hardness of gels prepared from protein concentrates and isolates | 3 |
| Table S1. Zeta potential of pea protein isolate after deamidation | 3 |


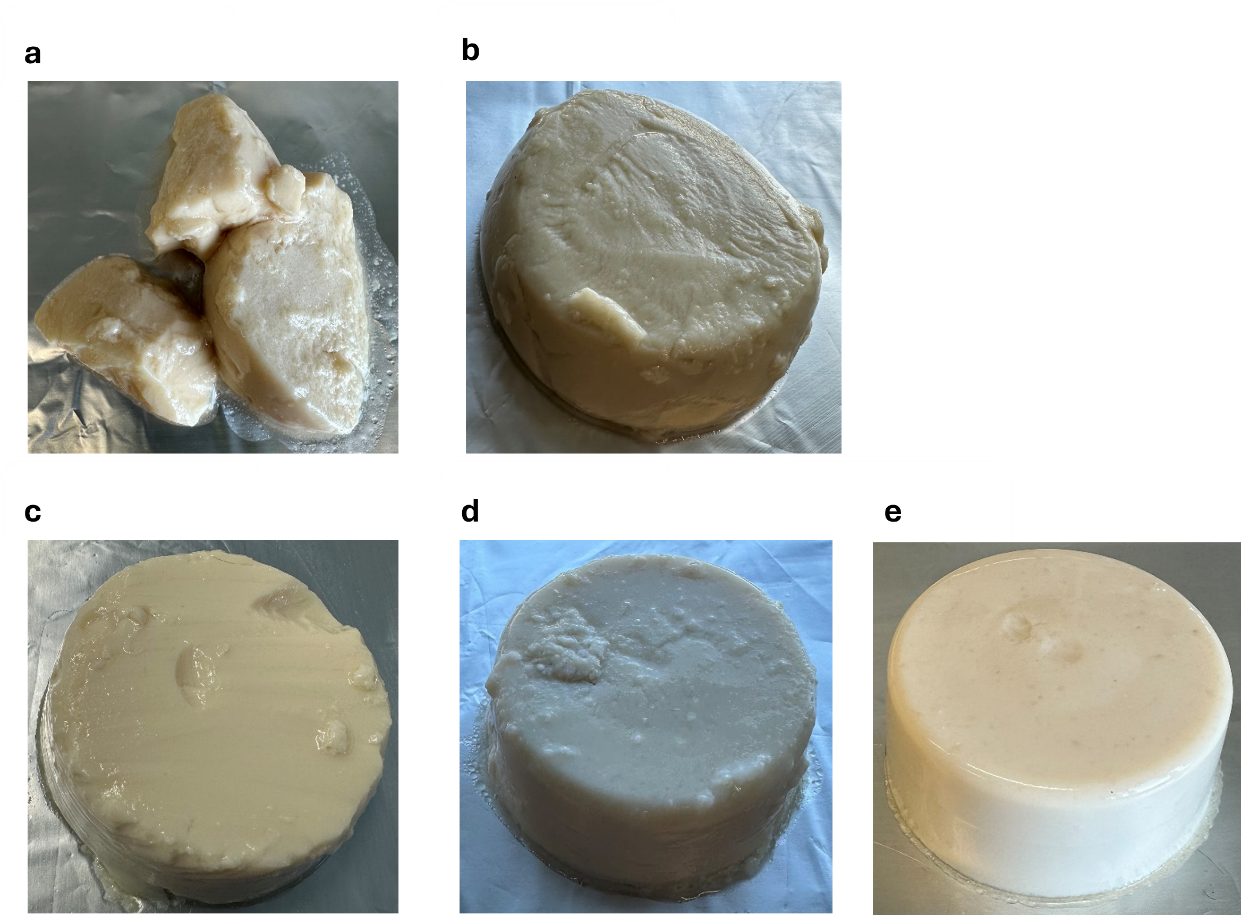


Figure S1: Gels prepared from (a) pea protein concentrate , (b) faba bean concentrate, (c) PPI, (d) FPI, and (e) SPI through fermentation combined with transglutaminase (TG) treatment.


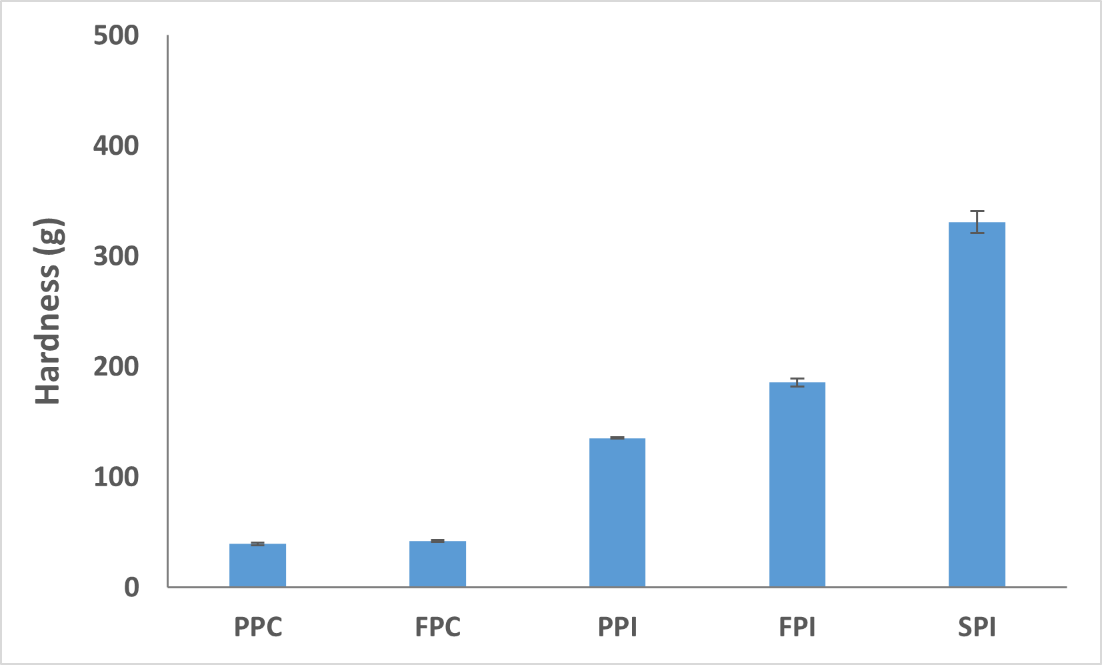


Figure S2: Hardness of the gels prepared from pea protein concentrate (PPC), faba bean concentrate (FPI), PPI, FPI, and SPI through fermentation combined in the presence of TG.

Table S1: Zeta potential of pea protein isolate (PPI) after protein glutaminase PG) treatment across varying enzyme concentrations and incubation durations.

| **PG conc. (U/g of protein)** | **Incubation time (h)** | **Zeta potential (mV)** |
| --- | --- | --- |
| 0 | 1 | -28.9 |
| 5 | 1 | -28.9 |
| 1.5 | -28.9 |
| 2 | -29.2 |
| 2.5 | -30.4 |
| 3 | -27.6 |
| 40 | 1 | -29.7 |
| 1.5 | -29.5 |
| 2 | -29.8 |
| 2.5 | -29.9 |
